# Supplementary material
Source: PubMed Central journal article supplement (PMC6785087)

### A DA release (dorsal striatum)

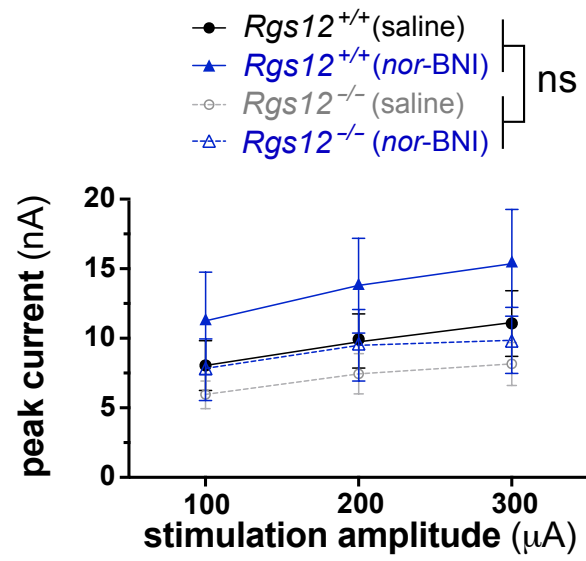

### B DA reuptake (dorsal striatum)

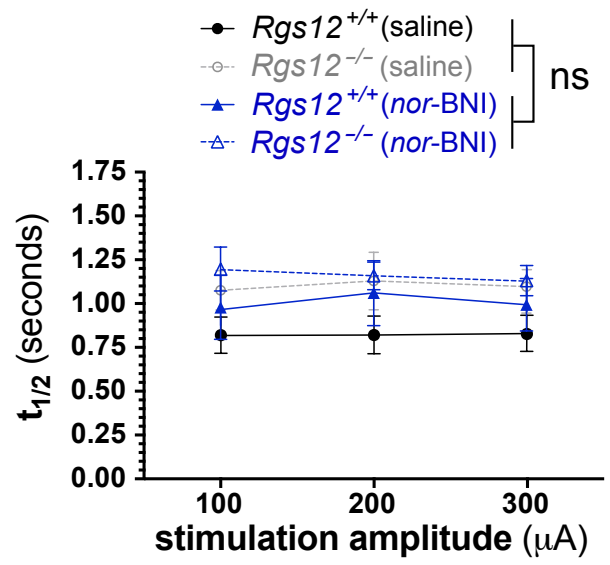

Supplement: 41386_2019_423_MOESM3_ESM.pdf [file 41386_2019_423_MOESM3_ESM.pdf]

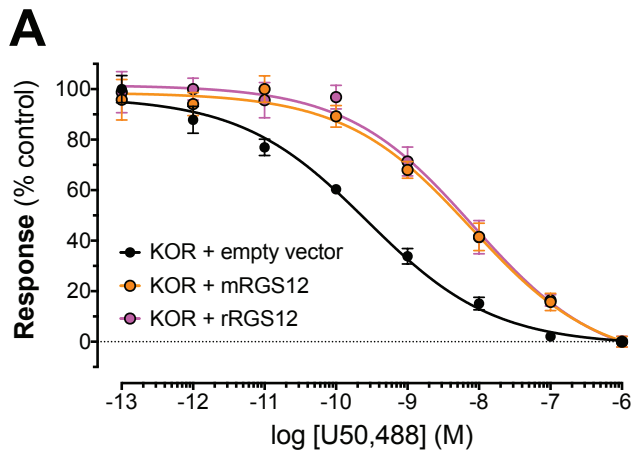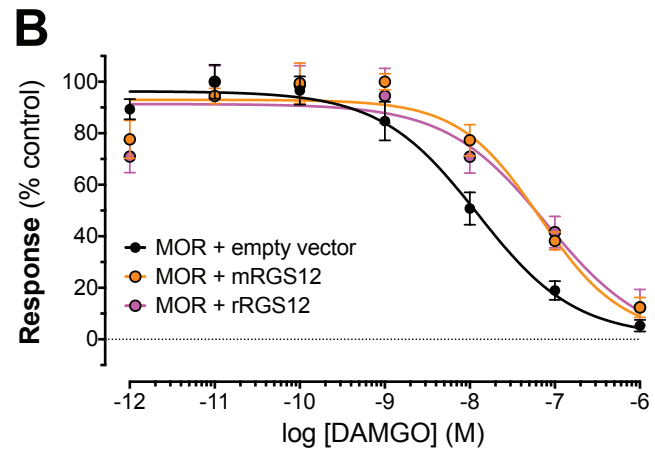

Supplement: 41386_2019_423_MOESM5_ESM.pdf [file 41386_2019_423_MOESM5_ESM.pdf]
